# Supplementary material for: Controllable graphene coated mesoporous carbon/sulfur composite for lithium–sulfur batteries
Source: Royal Society of Chemistry journal article supplement (doi:10.1039/c5ra14757c), 2015-01-01
Supplement: c5ra14757c1.pdf [file c5ra14757c1.pdf]

## Graphene Controllable Coated Mesoporous Carbon/Sulfur composite for Lithium-Sulfur Batteries

Shanliang Chen, Qunli Tang\*, Xiaohua Chen\*, Aiping Hu, Weina Deng, Zheng Liu

College of Materials Science and Engineering, Hunan University, Hunan Province Key  
Laboratory for Spray Deposition Technology and Application, Changsha 410082, China

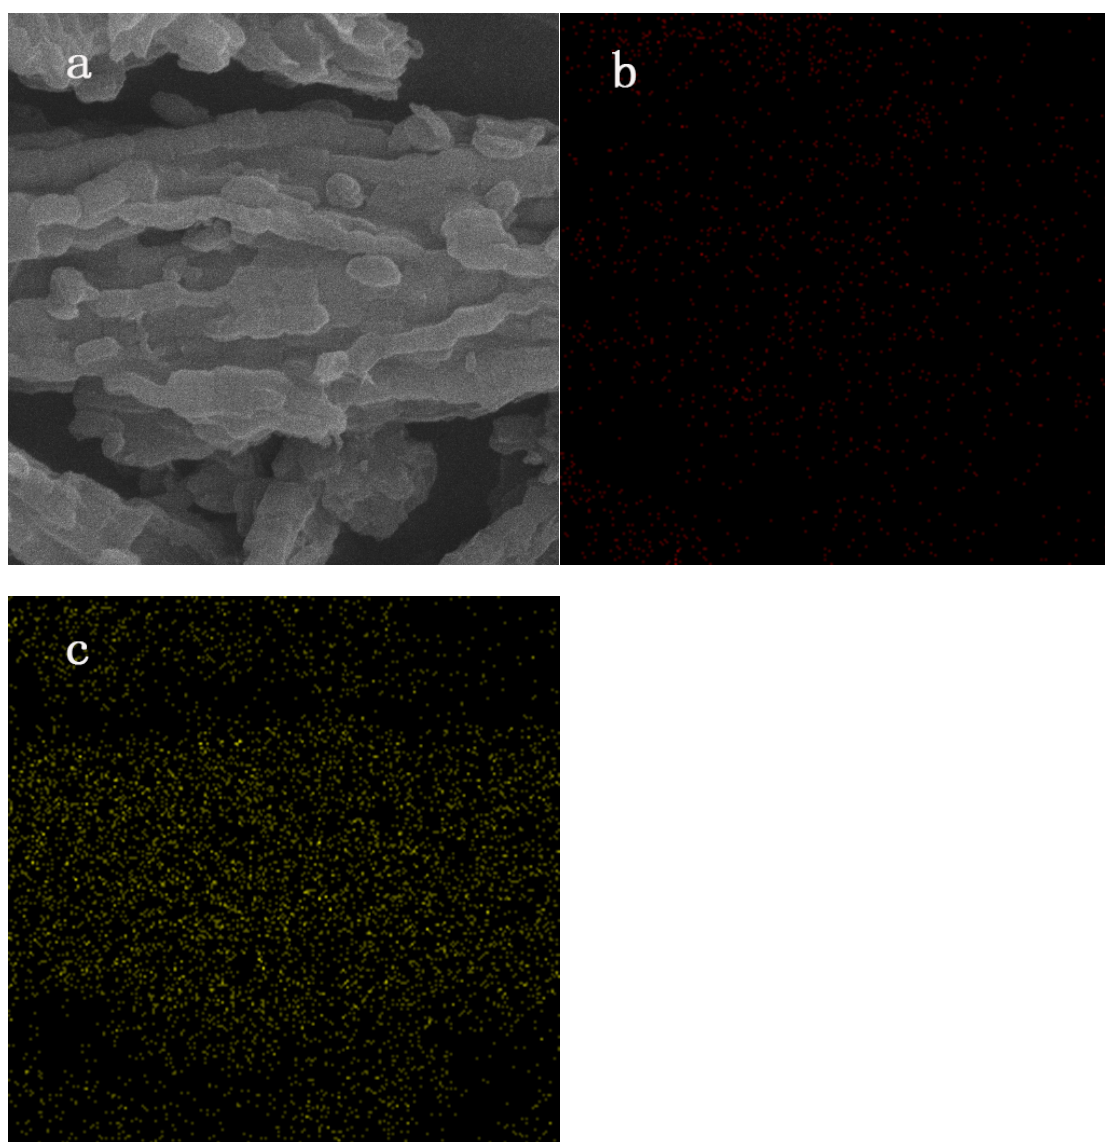

Fig. S1 (a) SEM images of CMK-3/S hybrids, elemental C (b) and S (c) maps of CMK-3/S composite from (a).
